# Supplementary material
Source: PubMed Central journal article supplement (PMC1450118)
Supplement: pnas_0600022103_9.pdf [file pnas_0600022103_9.pdf]

**Table 4. Helicoidal parameters for average structures of MD simulations.**

| MD         | Rise           | Prop Twst      | Roll         | Minor         | Major         | Incli        | Twist         | P-Radius      |
|------------|----------------|----------------|--------------|---------------|---------------|--------------|---------------|---------------|
| A10.1      | 3.47<br>(0.29) | -11.6<br>(4.3) | 2.6<br>(2.7) | 11.3<br>(0.4) | 20.3<br>(0.5) | 4.5<br>(4.6) | 32.8<br>(2.6) | 10.1<br>(0.6) |
| A10.2      | 3.41<br>(0.06) | -14.0<br>(2.3) | 1.7<br>(2.0) | 11.0<br>(0.3) | 20.5<br>(0.9) | 3.0<br>(3.6) | 33.1<br>(2.1) | 10.2<br>(0.3) |
| A10.3      | 3.36<br>(0.04) | -14.9<br>(1.7) | 1.1<br>(1.5) | 10.6<br>(0.2) | 20.2<br>(0.5) | 1.9<br>(2.7) | 33.7<br>(1.2) | 10.1<br>(0.3) |
| A10.4      | 3.44<br>(0.24) | -13.2<br>(5.0) | 1.8<br>(1.9) | 10.6<br>(0.2) | 20.1<br>(0.8) | 3.3<br>(3.6) | 33.2<br>(3.3) | 10.0<br>(0.2) |
| A20.1      | 3.37<br>(0.08) | -12.5<br>(1.5) | 1.4<br>(1.3) | 11.2<br>(0.3) | 20.9<br>(0.4) | 2.6<br>(2.6) | 32.5<br>(1.4) | 10.2<br>(0.3) |
| A20.2      | 3.34<br>(0.08) | -13.7<br>(2.3) | 1.6<br>(1.8) | 10.9<br>(0.2) | 20.5<br>(0.7) | 2.8<br>(3.1) | 33.4<br>(1.8) | 10.1<br>(0.3) |
| AT10.1     | 3.28<br>(0.12) | -11.3<br>(1.2) | 4.2<br>(4.5) | 12.4<br>(0.3) | 20.7<br>(0.2) | 7.1<br>(7.6) | 31.6<br>(2.6) | 10.4<br>(0.5) |
| AT10.2     | 3.28<br>(0.18) | -12.6<br>(3.4) | 3.1<br>(4.2) | 11.7<br>(0.3) | 20.0<br>(0.6) | 5.3<br>(7.4) | 32.0<br>(4.1) | 10.2<br>(0.7) |
| 1gip(NMR)* | 3.45<br>(0.08) | -15.0<br>(4.7) | 4.3<br>(5.4) | 13.1<br>(1.4) | 16.8<br>(0.2) | 7.0<br>(8.9) | 35.1<br>(1.8) | 9.5<br>(0.3)  |
| 1gip(MD)†  | 3.31<br>(0.14) | -11.1<br>(5.4) | 3.1<br>(4.7) | 11.6<br>(1.2) | 19.5<br>(0.7) | 6.7<br>(9.6) | 32.3<br>(5.5) | 9.9<br>(0.6)  |

Helicoidal parameters calculated using 3DNA. Numbers in parentheses are standard deviations.

\*NMR structural model of Drew-Dickerson DNA, d(CGCGAATTCGCG)<sub>2</sub> [Protein Data Bank entry ID code 1gip; Kuszewski, J., Schwieters, C. & Clore, G. M. (2001) *J. Am. Chem. Soc.* **123**, 3903-3918].

†A 4-ns MD simulation of Drew-Dickerson DNA starting from 1gip structure, with the same condition as simulation A10.3. SXD patterns shown in Fig. 10.
