# Supplementary material
Source: PubMed Central journal article supplement (PMC1450118)

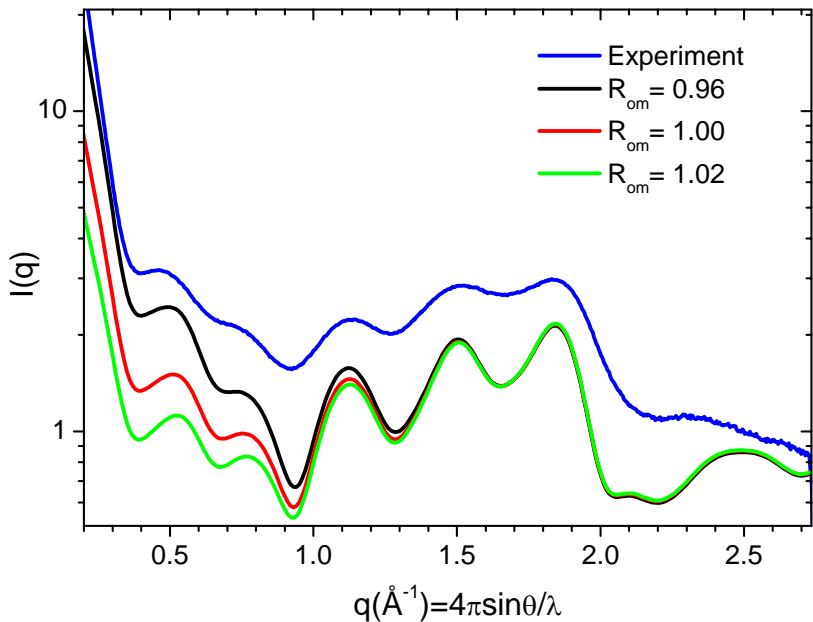

Supplement: pnas_0600022103_1.pdf [file pnas_0600022103_1.pdf]

**A.**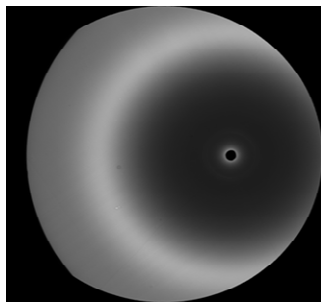**DNA solution****- 0.98 x**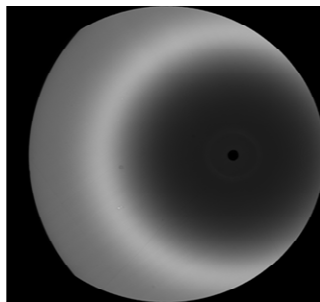**Solvent****=**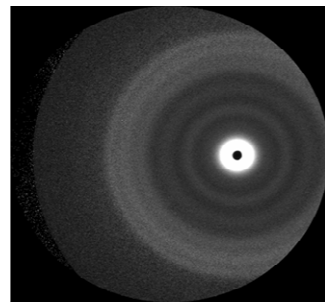**DNA SXD**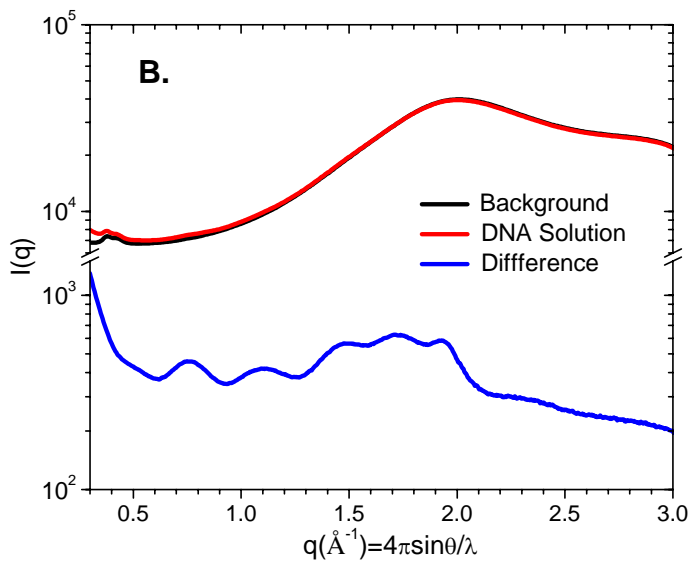

Supplement: pnas_0600022103_2.pdf [file pnas_0600022103_2.pdf]

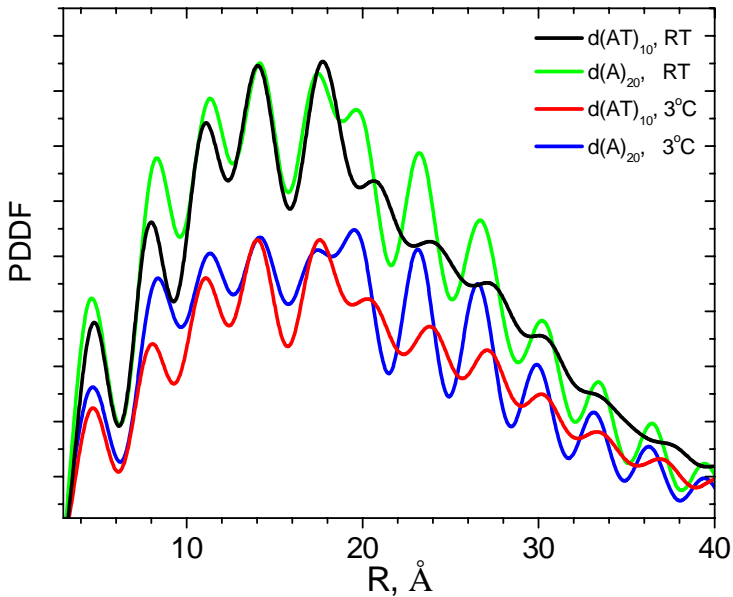

Supplement: pnas_0600022103_3.pdf [file pnas_0600022103_3.pdf]

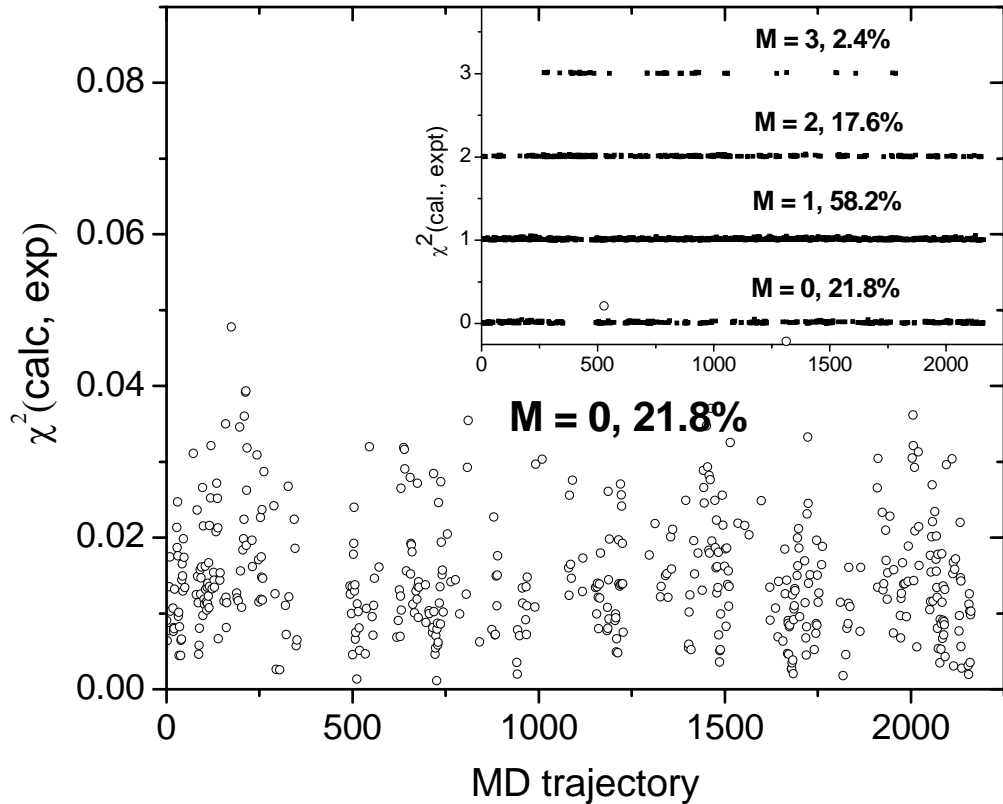

Supplement: pnas_0600022103_4.pdf [file pnas_0600022103_4.pdf]

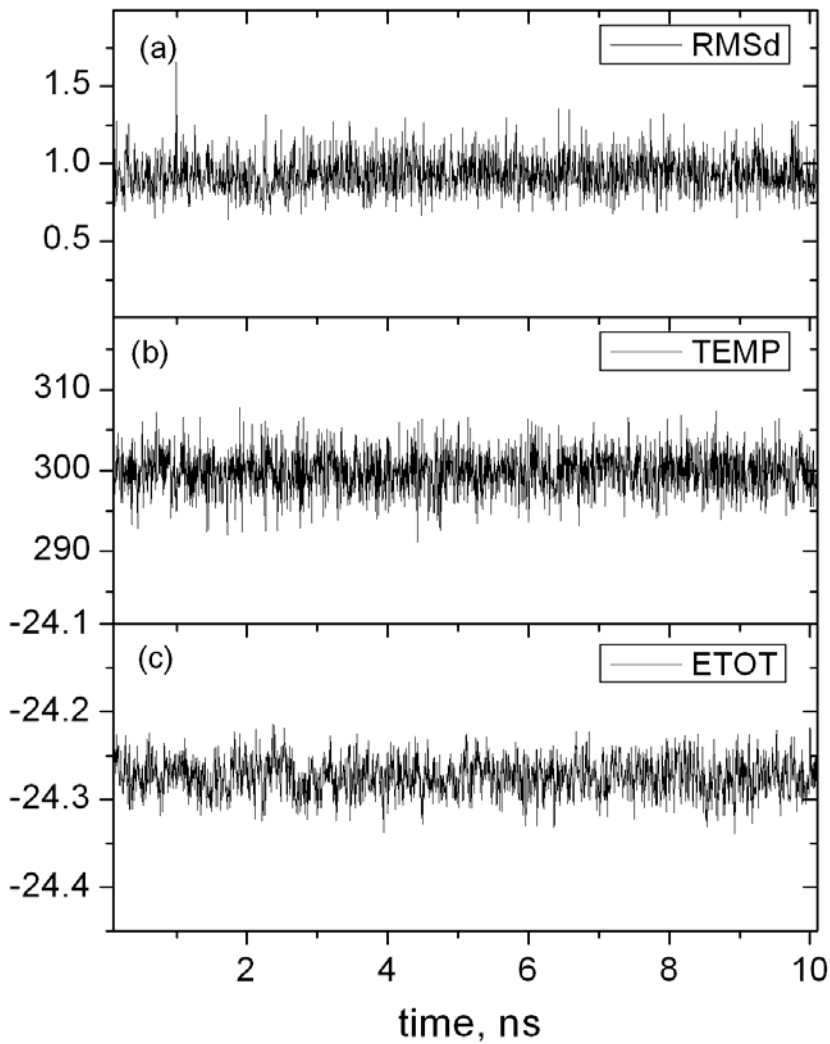

Supplement: pnas_0600022103_5.pdf [file pnas_0600022103_5.pdf]

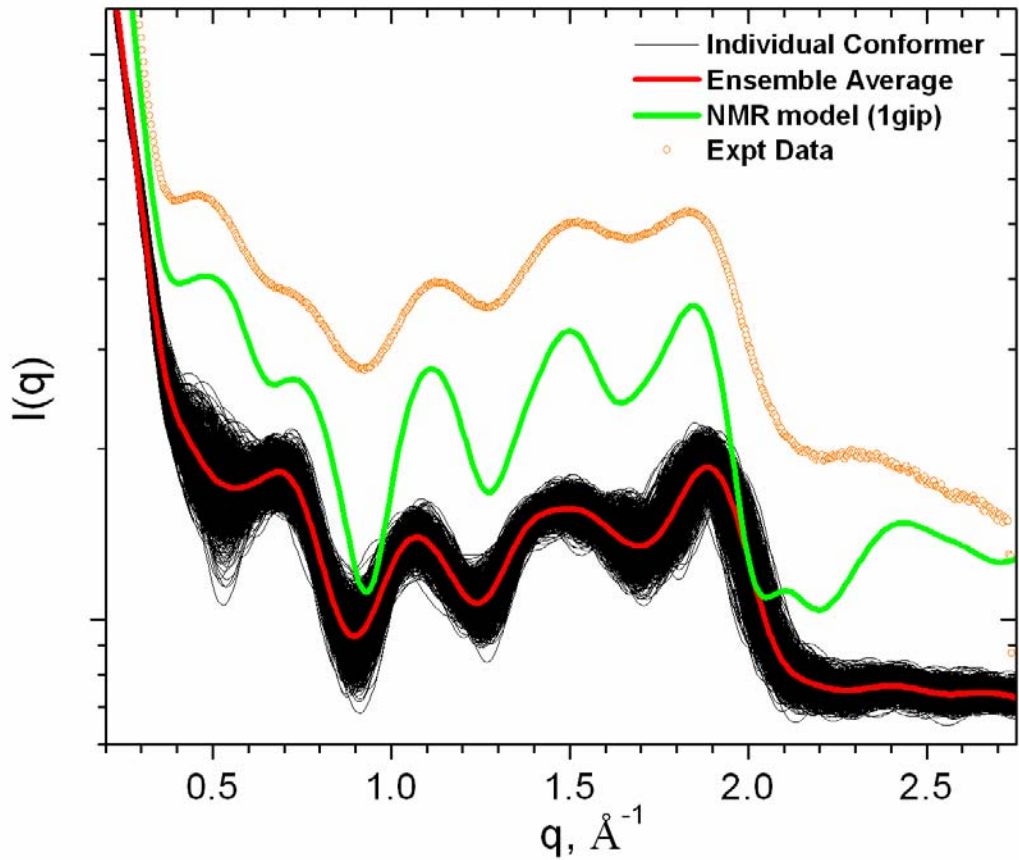

Supplement: pnas_0600022103_6.pdf [file pnas_0600022103_6.pdf]
